# Supplementary material
Source: Springer Nature journal article supplement (https://www.springermedizin.de/resource/supplementary/13054_2010_8656_MOESM6_ESM.pdf/9732494)

Granzyme B Signaling

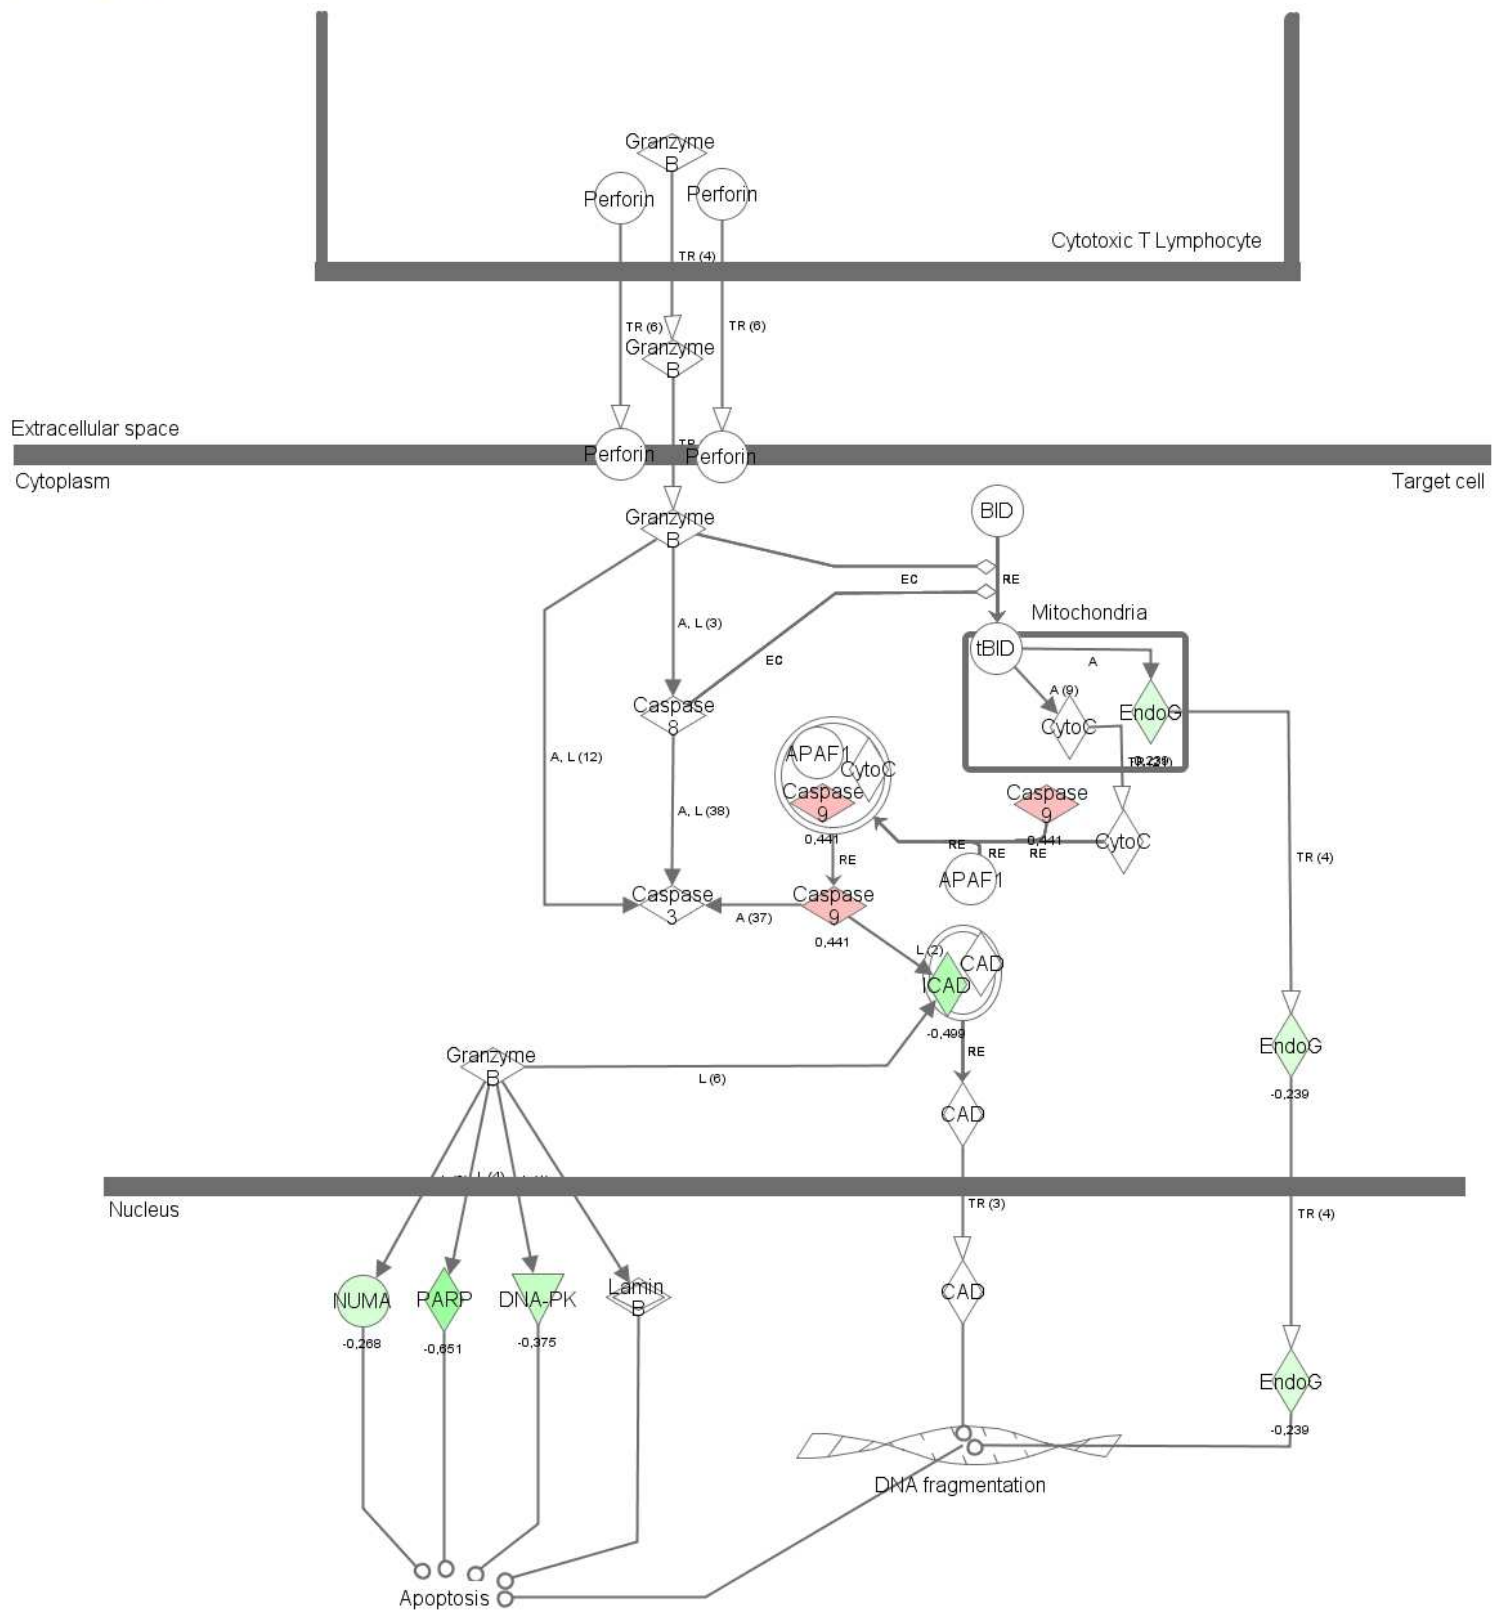

Supplement: MOESM6 [file 9732494]
